# Supplementary material for: Aliphatic carboxylic acid as a hydrogen-bond donor for converting CO2 and epoxide into cyclic carbonate under mild conditions
Source: Royal Society of Chemistry journal article supplement (doi:10.1039/d1nj01285a), 2021-01-01
Supplement: d1nj01285a1.pdf [file d1nj01285a1.pdf]

## Supporting Information

### Aliphatic Carboxylic Acid as Hydrogen-Bond Donor for Converting CO<sub>2</sub> and Epoxide into Cyclic Carbonate under Mild Conditions

Zheng Wang,<sup>\*a#</sup> Yajun Wang,<sup>b#</sup> Qianjie Xie,<sup>b#</sup> Zhiying Fan,<sup>c</sup> Yehua Shen<sup>\*b</sup>

<sup>a</sup>College of Food Science and Engineering, Northwest University, 710069 Xi'an, Shaanxi, China.

<sup>b</sup>Key Laboratory of Synthetic and Natural Functional Molecule Chemistry of Ministry of Education, College of Chemistry and Materials Science, Northwest University, 710127 Xi'an, Shaanxi, China.

<sup>c</sup>Chair of Inorganic and Metal-Organic Chemistry, Department Chemistry & Catalysis Research Center, Technical University of Munich (TUM), Lichtenbergstr. 4, 85748 Garching, Germany

<sup>#</sup>These authors contributed equally to this work.

Corresponding author: Dr. Zheng Wang; Email: zheng.wang@nwu.edu.cn

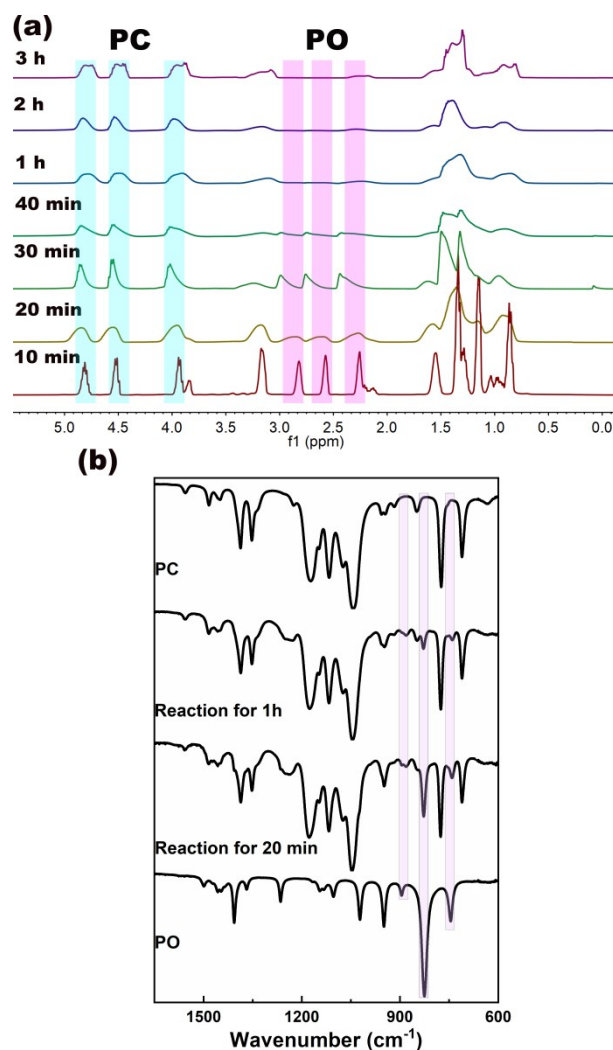

**Figure S1.** (a) <sup>1</sup>H NMR (nuclear magnetic resonance) spectra of the reaction mixture at different processing time (10 min, 20 min, 30 min, 40 min, 1h, 2h and 3h); (b) FT-IR (Fourier transform infrared spectroscopy) spectra of substrate PO, product PC, and the reaction mixture at different processing time (20 min and 1 h). Note that, the catalyst is PA/TBAB, and the reaction conditions are 80 °C and 4 bar injected CO<sub>2</sub>. Herein, PO, PC, PA and TBAB are propylene oxide, propylene carbonate and propionic acid and tetrabutylammonium bromide, respectively.

Viewing from the NMR and FT-IR spectra, it is apparent that the amount of substrate PO was decreasing and that of product PC was increasing with the extension of reaction time.

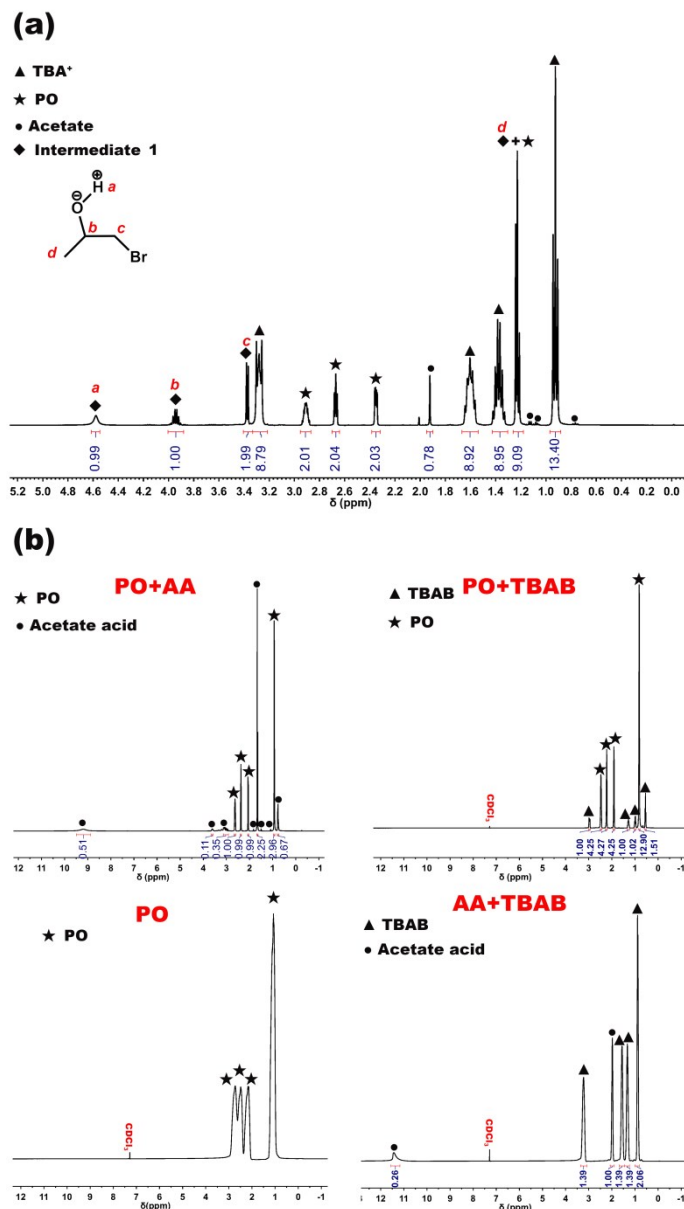

**Figure S2.** The NMR spectra of (a) the mixture of PO and equivalent (AA = acetic acid), (b) the mixture of PO and AA, PO and TBAB, PO and AA+TBAB. Herein, the catalyst AA/TBAB loading amount was increased to 33 mol% relative to PO for clearly showing the signals.

As shown in Figure S2a&b, a new phase, which can be assigned to the epoxide ring-opening intermediate 1, could only detect in the mixture of PO and AA/TBAB by comparing with other mixture of PO and AA, PO and TBAB, PO and AA and TBAB. Please note that, the NMR signal of AA seems randomly distributed for the mixture of PO and AA, and this probably because of the hydrogen bond formed between AA and ( $\pm$ )-PO molecules.<sup>[1]</sup> And this phenomenon can be also observed in the NMR of mixture PO and AA/TBAB.

## Reference

- [1] T. Buruiana, V. Melinte, L. Stroea, E. C. Buruiana, *Polym. J.* **2009**, *41*, 978.
